# Supplementary material
Source: HighWire-hosted journal article supplement (https://jech.bmj.com/content/75/7/658)
Supplement: inline-supplementary-material-1 [file inline-supplementary-material-1.pdf]

**Supplemental Table 1:** Survey-weighted means and standard errors for outcome variables, stratified by analytic subgroups

| Outcome                                | Gender | Non-Hispanic White | Non-Hispanic Black | No History of Parental Incarceration | History of Parental Incarceration |
|----------------------------------------|--------|--------------------|--------------------|--------------------------------------|-----------------------------------|
| CDI                                    | Girls  | 2.72 (0.14)        | 2.26 (0.14)        | 2.58 (0.12)                          | 3.22 (0.42)                       |
|                                        | Boys   | 1.93 (0.12)        | 1.96 (0.18)        | 1.87 (0.10)                          | 2.72 (0.51)                       |
| Subjective well-being combined measure | Girls  | 4.29 (0.05)        | 4.24 (0.08)        | 4.30 (0.04)                          | 4.03 (0.13)                       |
|                                        | Boys   | 4.17 (0.05)        | 4.26 (0.07)        | 4.22 (0.05)                          | 3.95 (0.16)                       |
| Emotional well-being                   | Girls  | 4.83 (0.05)        | 4.84 (0.07)        | 4.84 (0.04)                          | 4.70 (0.14)                       |
|                                        | Boys   | 4.80 (0.05)        | 4.79 (0.08)        | 4.82 (0.04)                          | 4.48 (0.20)                       |
| Social well-being                      | Girls  | 3.60 (0.06)        | 3.68 (0.09)        | 3.60 (0.06)                          | 3.18 (0.19)                       |
|                                        | Boys   | 3.56 (0.06)        | 3.41 (0.11)        | 3.61 (0.06)                          | 3.28 (0.19)                       |
| Psychologic well-being                 | Girls  | 4.73 (0.06)        | 4.82 (0.08)        | 4.77 (0.04)                          | 4.57 (0.12)                       |
|                                        | Boys   | 4.49 (0.06)        | 4.60 (0.08)        | 4.53 (0.05)                          | 4.38 (0.15)                       |

Note: data were multiply imputed

**Supplemental Table 2:** Effect modification between parental incarceration and number of police stops in the associations with Children's Depression Inventory scores, among adolescents in the Panel Study of Income Dynamics (2002 & 2007) stratified by gender

|                                     | Girls                   |         |                         |         | Boys                    |         |                         |         |
|-------------------------------------|-------------------------|---------|-------------------------|---------|-------------------------|---------|-------------------------|---------|
|                                     | Model 1                 |         | Model 2                 |         | Model 1                 |         | Model 2                 |         |
|                                     | $\beta$<br>(95% CI)     | P-value |
| No stops, no parental incarceration | Ref.                    |         | Ref.                    |         | Ref.                    |         | Ref.                    |         |
| No stops, parental incarceration    | -0.08<br>(-0.75, 0.59)  | 0.82    | -0.18<br>(-0.86, 0.50)  | 0.61    | -0.22<br>(-0.82, 0.38)  | 0.48    | -0.43<br>(-1.01, 0.15)  | 0.14    |
| 1 stop, no parental incarceration   | 1.48<br>(0.61, 2.35)    | 0.00    | 1.28<br>(0.43, 2.13)    | 0.00    | 0.66<br>(-0.02, 1.34)   | 0.06    | 0.68<br>(0.02, 1.35)    | 0.05    |
| 1 stop, parental incarceration      | 1.56<br>(0.09, 3.04)    | 0.04    | 1.53<br>(0.01, 3.05)    | 0.05    | 3.64<br>(0.12, 7.16)    | 0.04    | 3.33<br>(0.25, 6.41)    | 0.03    |
| 2+ stops, no parental incarceration | 1.50<br>(0.60, 2.39)    | 0.00    | 1.49<br>(0.61, 2.38)    | 0.00    | 0.53<br>(-0.19, 1.25)   | 0.15    | 0.66<br>(-0.01, 1.34)   | 0.05    |
| 2+ stops, parental incarceration    | 5.59<br>(3.91, 7.27)    | 0.00    | 5.48<br>(3.77, 7.18)    | 0.00    | 1.42<br>(-0.09, 2.94)   | 0.07    | 1.50<br>(0.19, 2.81)    | 0.02    |
| Age                                 | 0.12<br>(0.01, 0.22)    | 0.03    | 0.15<br>(0.04, 0.26)    | 0.01    | -0.03<br>(-0.13, 0.07)  | 0.53    | 0.08<br>(-0.04, 0.19)   | 0.21    |
| Non-Hispanic White                  | Ref.                    |         | Ref.                    |         | Ref.                    |         | Ref.                    |         |
| Non-Hispanic Black                  | -0.58<br>(-0.95, -0.20) | 0.00    | -0.87<br>(-1.35, -0.39) | 0.00    | -0.17<br>(-0.62, 0.28)  | 0.46    | -0.37<br>(-0.85, 0.10)  | 0.12    |
| Hispanic                            | 0.10<br>(-0.58, 0.78)   | 0.77    | 0.21<br>(-0.57, 1.00)   | 0.59    | 0.61<br>(-0.13, 1.36)   | 0.10    | 0.34<br>(-0.52, 1.20)   | 0.44    |
| Asian & Pacific Islander            | -0.46<br>(-1.23, 0.31)  | 0.24    | -0.30<br>(-1.28, 0.69)  | 0.56    | 0.38<br>(-0.34, 1.09)   | 0.31    | 0.20<br>(-0.62, 1.02)   | 0.63    |
| American Indian & Alaska Native     |                         |         |                         |         | 1.11<br>(-2.13, 4.35)   | 0.50    | 1.04<br>(-1.78, 3.85)   | 0.47    |
| Multiracial                         | -0.10<br>(-1.33, 1.13)  | 0.88    | -0.18<br>(-1.42, 1.06)  | 0.77    | 0.04<br>(-1.18, 1.27)   | 0.94    | 0.05<br>(-1.11, 1.21)   | 0.93    |
| Other                               | -1.06<br>(-2.44, 0.32)  | 0.13    | -1.23<br>(-2.75, 0.28)  | 0.11    | 1.29<br>(-0.83, 3.41)   | 0.23    | 0.75<br>(-1.08, 2.58)   | 0.42    |
| Survey wave                         | -0.87<br>(-1.27, -0.48) | 0.00    | -0.88<br>(-1.27, -0.48) | 0.00    | -0.55<br>(-0.95, -0.16) | 0.01    | -0.65<br>(-1.04, -0.25) | 0.00    |
| Height                              |                         |         | 0.00<br>(-0.08, 0.08)   | 0.92    |                         |         | -0.06<br>(-0.01, 0.03)  | 0.03    |
| Weight                              |                         |         | 0.00<br>(-0.00, 0.01)   | 0.24    |                         |         | 0.00<br>(-0.00, 0.01)   | 0.13    |
| Employment                          |                         |         | -0.20<br>(-0.72, 0.31)  | 0.43    |                         |         | -0.82<br>(-1.25, -0.40) | 0.00    |
| Living in public housing            |                         |         | 0.47<br>(-0.29, 1.23)   | 0.22    |                         |         | -0.42<br>(-1.19, 0.35)  | 0.28    |
| Debt (negative wealth)              |                         |         | 0.60<br>(-0.09, 1.29)   |         |                         |         | 0.07<br>(-0.51, 0.66)   | 0.80    |
| Wealth Q1                           |                         |         | 0.72<br>(-0.13, 1.56)   | 0.09    |                         |         | 0.09<br>(-0.61, 0.79)   | 0.80    |
| Wealth Q2                           |                         |         | 0.86<br>(0.25, 1.48)    | 0.10    |                         |         | -0.12<br>(-0.71, 0.47)  | 0.69    |
| Wealth Q3                           |                         |         | 0.45                    | 0.01    |                         |         | 0.07                    | 0.78    |

|                                  |  |  |                         |      |     |                         |      |
|----------------------------------|--|--|-------------------------|------|-----|-------------------------|------|
|                                  |  |  | (-0.12, 1.02)           |      |     | (-0.44, 0.59)           |      |
| Wealth Q4                        |  |  | Ref                     |      | Ref | Ref                     |      |
| Beale Urbanicity Index 1         |  |  | Ref                     |      | Ref | Ref                     |      |
| Beale Urbanicity Index 2         |  |  | -0.24<br>(-0.82, 0.34)  | 0.42 |     | -0.05<br>(-0.62, 0.52)  | 0.86 |
| Beale Urbanicity Index 3         |  |  | -0.25<br>(-0.25, -0.82) | 0.39 |     | -0.03<br>(-0.58, 0.53)  | 0.92 |
| Beale Urbanicity Index 4         |  |  | -0.96<br>(-1.74, -0.18) | 0.02 |     | -0.86<br>(-0.51, -0.20) | 0.01 |
| Beale Urbanicity Index 5         |  |  | 0.05<br>(-1.03, 1.12)   | 0.93 |     | -0.56<br>(-1.31, 0.19)  | 0.14 |
| Beale Urbanicity Index 6         |  |  | -0.07<br>(-1.30, 1.15)  | 0.91 |     | -0.54<br>(-1.28, 0.20)  | 0.15 |
| Beale Urbanicity Index 7         |  |  | 0.67<br>(-0.32, 1.67)   | 0.19 |     | 0.26<br>(-0.73, 1.25)   | 0.61 |
| Beale Urbanicity Index 8         |  |  | 0.34<br>(-0.43, 1.11)   | 0.38 |     | -0.01<br>(-0.70, 0.69)  | 0.99 |
| Beale Urbanicity Index 9         |  |  | 0.60<br>(-1.06, 2.26)   | 0.48 |     | -0.40<br>(-1.53, 0.73)  | 0.49 |
| Beale Urbanicity Index 10        |  |  | -0.93<br>(-1.93, 0.07)  | 0.07 |     | -1.25<br>(-2.01, -0.49) | 0.00 |
| Neighborhood completely safe     |  |  | Ref                     |      | Ref | Ref                     |      |
| Neighborhood fairly safe         |  |  | 0.20<br>(-0.23, 0.63)   | 0.36 |     | 0.21<br>(-0.17, 0.60)   | 0.27 |
| Neighborhood somewhat dangerous  |  |  | -0.23<br>(-0.87, 0.41)  | 0.48 |     | 0.37<br>(-0.32, 1.07)   | 0.29 |
| Neighborhood extremely dangerous |  |  | -1.12<br>(-2.31, 0.06)  | 0.06 |     | 0.11<br>(-1.46, 1.67)   | 0.89 |
| Moved in the past year           |  |  | 0.78<br>(0.01, 1.55)    | 0.05 |     | 0.47<br>(-0.25, 1.19)   | 0.20 |
| Mother's education <12 years     |  |  | -0.11<br>(-1.31, 1.08)  | 0.85 |     | -0.38<br>(-1.42, 0.66)  | 0.47 |
| Mother's education 12 years      |  |  | -0.04<br>(-0.95, 0.86)  | 0.92 |     | -0.19<br>(-1.00, 0.63)  | 0.65 |
| Mother's education 13-16 years   |  |  | 0.26<br>(-0.59, 1.12)   | 0.55 |     | 0.05<br>(-0.72, 0.82)   | 0.91 |
| Mother's education >16 years     |  |  | Ref                     |      | Ref | Ref                     |      |
| Father's education <12 years     |  |  | -0.11<br>(-1.21, 0.98)  | 0.84 |     | 0.24<br>(-0.72, 1.20)   | 0.63 |
| Father's education 12 years      |  |  | -0.03<br>(-0.84, 0.78)  | 0.94 |     | 0.03<br>(-0.74, 0.79)   | 0.95 |
| Father's education 13-16 years   |  |  | -0.07<br>(-0.83, 0.68)  | 0.85 |     | -0.22<br>(-0.95, 0.51)  | 0.55 |
| Father's education >16 years     |  |  | Ref                     |      | Ref | Ref                     |      |

**Supplemental Table 3:** Associations between the number of police stops and combined subjective well-being score for non-Hispanic Black and White adolescents from the Panel Study of Income Dynamics (2002 & 2007) stratified by race/ethnicity and gender

|       |          | Non-Hispanic White (Age Adjusted) |         | Non-Hispanic White (Fully Adjusted) |         | Non-Hispanic Black (Age Adjusted) |         | Non-Hispanic Black (Fully Adjusted) |         |
|-------|----------|-----------------------------------|---------|-------------------------------------|---------|-----------------------------------|---------|-------------------------------------|---------|
|       |          | $\beta$ (95% CI)                  | P-value | $\beta$ (95% CI)                    | P-value | $\beta$ (95% CI)                  | P-value | $\beta$ (95% CI)                    | P-value |
| Girls | 0 stops  | Ref                               |         | Ref                                 |         | Ref                               |         | Ref                                 |         |
|       | 1 stop   | -0.25<br>(-0.49, -0.01)           | 0.04    | -0.11<br>(-0.37, 0.14)              | 0.39    | -0.52<br>(-0.92, -0.11)           | 0.01    | -0.60<br>(-0.97, -0.22)             | 0.00    |
|       | 2+ stops | -0.55<br>(-0.85, -0.24)           | 0.00    | -0.44<br>(-0.73, -0.15)             | 0.00    | -0.92<br>(-1.45, -0.40)           | 0.00    | -0.83<br>(-1.38, -0.28)             | 0.00    |
| Boys  | 0 stops  | Ref                               |         | Ref                                 |         | Ref                               |         | Ref                                 |         |
|       | 1 stop   | -0.40<br>(-0.72, -0.07)           | 0.02    | -0.32<br>(-0.63, -0.02)             | 0.03    | 0.27<br>(-0.05, 0.59)             | 0.10    | 0.25<br>(-0.05, 0.54)               | 0.10    |
|       | 2+ stops | -0.30<br>(-0.62, 0.02)            | 0.07    | -0.27<br>(-0.58, 0.03)              | 0.08    | -0.27<br>(-0.66, 0.11)            | 0.16    | -0.19<br>(-0.53, 0.15)              | 0.27    |

Age-adjusted models include age and survey wave, and applies survey weights.

Fully-adjusted models include age, height, weight, employment, living in public housing, whether moved in the last year, wealth, urbanicity, neighborhood safety, maternal and paternal educational attainment, survey wave and applies survey weights.

\*This model is only among Non-Hispanic Black and White adolescents only due to insufficient sample size for other racial/ethnic groups

**Supplemental Table 4:** Effect modification between parental incarceration and number of police stops in the associations with combined well-being scores among adolescents from the Panel Study of Income Dynamics (2002 & 2007), stratified by gender

|                                     | Girls                   |         |                         |         | Boys                    |         |                         |         |
|-------------------------------------|-------------------------|---------|-------------------------|---------|-------------------------|---------|-------------------------|---------|
|                                     | Model 1                 |         | Model 2                 |         | Model 1                 |         | Model 2                 |         |
|                                     | $\beta$<br>(95% CI)     | P-value |
| No stops, no parental incarceration | Ref.                    |         | Ref.                    |         | Ref.                    |         | Ref.                    |         |
| No stops, parental incarceration    | -0.34<br>(-0.63, -0.05) | 0.02    | -0.30<br>(-0.58, -0.02) | 0.03    | -0.21<br>(-0.57, 0.15)  | 0.26    | -0.08<br>(-0.41, 0.26)  | 0.65    |
| 1 stop, no parental incarceration   | -0.48<br>(-0.74, -0.21) | 0.00    | -0.39<br>(-0.65, -0.14) | 0.00    | -0.08<br>(-0.33, 0.18)  | 0.55    | -0.06<br>(-0.32, 0.19)  | 0.63    |
| 1 stop, parental incarceration      | -0.11<br>(-0.46, 0.24)  | 0.53    | -0.02<br>(-0.48, 0.44)  | 0.92    | -0.80<br>(-1.72, 0.11)  | 0.09    | -0.64<br>(-1.55, 0.27)  | 0.17    |
| 2+ stops, no parental incarceration | -0.54<br>(-0.79, -0.29) | 0.00    | -0.47<br>(-0.71, -0.22) | 0.00    | -0.37<br>(-0.61, -0.13) | 0.00    | -0.36<br>(-0.59, -0.12) | 0.00    |
| 2+ stops, parental incarceration    | -1.15<br>(-1.80, -0.49) | 0.00    | -1.10<br>(-1.82, -0.39) | 0.00    | -0.11<br>(-0.60, 0.39)  | 0.68    | -0.08<br>(-0.60, 0.45)  | 0.77    |
| Age                                 | -0.01<br>(-0.05, 0.03)  | 0.53    | -0.02<br>(-0.06, 0.03)  | 0.45    | 0.03<br>(-0.02, 0.07)   | 0.30    | 0.01<br>(-0.04, 0.07)   | 0.67    |
| Non-Hispanic White                  | Ref.                    |         | Ref.                    |         | Ref.                    |         | Ref.                    |         |
| Non-Hispanic Black                  | -0.06<br>(-0.24, 0.12)  | 0.51    | 0.12<br>(-0.07, 0.32)   | 0.20    | 0.13<br>(-0.03, 0.29)   | 0.10    | 0.33<br>(0.14, 0.52)    | 0.00    |
| Hispanic                            | -0.36<br>(-0.60, -0.11) | 0.00    | -0.09<br>(-0.39, 0.20)  | 0.53    | -0.21<br>(-0.58, 0.16)  | 0.27    | 0.11<br>(-0.28, 0.51)   | 0.57    |
| Asian & Pacific Islander            | -0.07<br>(-0.60, 0.46)  | 0.79    | -0.01<br>(-0.56, 0.54)  | 0.98    | -0.19<br>(-0.54, 0.15)  | 0.27    | -0.08<br>(-0.51, 0.35)  | 0.73    |
| American Indian & Alaska Native     |                         |         |                         |         | -0.11<br>(-1.33, 1.11)  | 0.86    | -0.26<br>(-1.29, 0.78)  | 0.63    |
| Multiracial                         | -0.64<br>(-1.02, -0.26) | 0.00    | -0.55<br>(-0.95, -0.15) | 0.01    | 0.05<br>(-0.30, 0.41)   | 0.77    | 0.08<br>(-0.34, 0.50)   | 0.71    |
| Other                               | -0.89<br>(-1.45, -0.33) | 0.00    | -0.67<br>(-1.19, -0.15) | 0.01    | -1.02<br>(-2.06, 0.01)  | 0.05    | -0.82<br>(-1.99, 0.35)  | 0.17    |
| Survey wave                         | 0.36<br>(0.22, 0.50)    | 0.00    | 0.34<br>(0.20, 0.48)    | 0.00    | 0.31<br>(0.14, 0.49)    | 0.00    | 0.33<br>(0.16, 0.50)    | 0.00    |
| Height                              |                         |         | 0.01<br>(-0.02, 0.03)   | 0.70    |                         |         | 0.00<br>(-0.02, 0.03)   | 0.82    |
| Weight                              |                         |         | 0.00<br>(-0.00, 0.00)   | 0.55    |                         |         | 0.00<br>(-0.00, 0.00)   | 0.91    |
| Employment                          |                         |         | -0.03<br>(-0.19, 0.13)  | 0.73    |                         |         | 0.10<br>(-0.10, 0.31)   | 0.33    |
| Living in public housing            |                         |         | -0.46<br>(-0.81, -0.11) | 0.01    |                         |         | -0.02<br>(-0.02, -0.51) | 0.92    |
| Debt (negative wealth)              |                         |         | -0.22<br>(-0.46, 0.01)  | 0.06    |                         |         | -0.20<br>(-0.52, 0.11)  | 0.21    |
| Wealth Q1                           |                         |         | -0.15<br>(-0.42, 0.12)  | 0.28    |                         |         | -0.14<br>(-0.46, 0.18)  | 0.39    |
| Wealth Q2                           |                         |         | -0.16<br>(-0.38, 0.05)  | 0.14    |                         |         | -0.22<br>(-0.49, 0.04)  | 0.10    |
| Wealth Q3                           |                         |         | -0.11                   | 0.28    |                         |         | -0.13                   | 0.23    |

|                                  |  |  |                        |      |  |  |                        |      |
|----------------------------------|--|--|------------------------|------|--|--|------------------------|------|
|                                  |  |  | (-0.31, 0.09)          |      |  |  | (-0.34, 0.08)          |      |
| Wealth Q4                        |  |  | Ref                    | .    |  |  | Ref                    | .    |
| Beale Urbanicity Index 1         |  |  | Ref                    | .    |  |  | Ref                    | .    |
| Beale Urbanicity Index 2         |  |  | -0.11<br>(-0.33, 0.11) | 0.33 |  |  | 0.00<br>(-0.25, 0.25)  | 0.99 |
| Beale Urbanicity Index 3         |  |  | -0.09<br>(-0.28, 0.10) | 0.35 |  |  | 0.18<br>(-0.08, 0.44)  | 0.17 |
| Beale Urbanicity Index 4         |  |  | 0.16<br>(-0.12, 0.44)  | 0.25 |  |  | 0.36<br>(-0.03, 0.74)  | 0.07 |
| Beale Urbanicity Index 5         |  |  | 0.11<br>(-0.16, 0.39)  | 0.42 |  |  | 0.41<br>(0.05, 0.78)   | 0.03 |
| Beale Urbanicity Index 6         |  |  | 0.18<br>(-0.39, 0.75)  | 0.54 |  |  | 0.31<br>(-0.03, 0.64)  | 0.07 |
| Beale Urbanicity Index 7         |  |  | -0.12<br>(-0.43, 0.19) | 0.46 |  |  | 0.03<br>(-.29, 0.34)   | 0.88 |
| Beale Urbanicity Index 8         |  |  | -0.01<br>(-0.30, 0.28) | 0.96 |  |  | 0.12<br>(-0.19, 0.42)  | 0.46 |
| Beale Urbanicity Index 9         |  |  | 0.12<br>(-0.28, 0.53)  | 0.55 |  |  | 0.29<br>(-0.08, 0.67)  | 0.13 |
| Beale Urbanicity Index 10        |  |  | -0.14<br>(-0.72, 0.45) | 0.65 |  |  | 0.62<br>(0.05, 1.18)   | 0.03 |
| Neighborhood completely safe     |  |  | Ref                    | .    |  |  | Ref                    | .    |
| Neighborhood fairly safe         |  |  | -0.02<br>(-0.16, 0.13) | 0.83 |  |  | -0.03<br>(-0.20, 0.14) | 0.76 |
| Neighborhood somewhat dangerous  |  |  | -0.04<br>(-0.30, 0.23) | 0.79 |  |  | 0.01<br>(-0.31, 0.33)  | 0.94 |
| Neighborhood extremely dangerous |  |  | 0.11<br>(-0.83, 1.04)  | 0.82 |  |  | -0.34<br>(-0.98, 0.30) | 0.30 |
| Moved in the past year           |  |  | -0.07<br>(-0.37, 0.23) | 0.63 |  |  | -0.13<br>(-0.42, 0.17) | 0.41 |
| Mother's education <12 years     |  |  | -0.28<br>(-0.66, 0.11) | 0.16 |  |  | -0.21<br>(-0.70, 0.27) | 0.38 |
| Mother's education 12 years      |  |  | -0.19<br>(-0.46, 0.07) | 0.16 |  |  | -0.28<br>(-0.62, 0.07) | 0.11 |
| Mother's education 13-16 years   |  |  | 0.01<br>(-0.23, 0.25)  | 0.94 |  |  | -0.19<br>(-0.51, 0.14) | 0.26 |
| Mother's education >16 years     |  |  | Ref                    | .    |  |  | Ref                    | .    |
| Father's education <12 years     |  |  | -0.04<br>(-0.43, 0.36) | 0.86 |  |  | -0.42<br>(-0.90, 0.07) | 0.09 |
| Father's education 12 years      |  |  | 0.04<br>(-0.24, 0.32)  | 0.77 |  |  | -0.23<br>(-0.58, 0.13) | 0.21 |
| Father's education 13-16 years   |  |  | 0.03<br>(-0.23, 0.28)  | 0.85 |  |  | -0.09<br>(-0.40, 0.21) | 0.55 |
| Father's education >16 years     |  |  | Ref                    | .    |  |  | Ref                    | .    |

**Supplemental Table 5:** Effect modification between parental incarceration and number of police stops in the associations with subjective well-being domains among adolescents from the Panel Study of Income Dynamics (2002 & 2007), stratified by gender

|                        |                                     | Girls                   |         |                         |         | Boys                    |         |                         |         |
|------------------------|-------------------------------------|-------------------------|---------|-------------------------|---------|-------------------------|---------|-------------------------|---------|
|                        |                                     | Model 1                 |         | Model 2                 |         | Model 1                 |         | Model 2                 |         |
|                        |                                     | $\beta$<br>(95% CI)     | P-value |
| Emotional well-being   | No stops, no parental incarceration | Ref.                    |         | Ref.                    |         | Ref.                    |         | Ref.                    |         |
|                        | No stops, parental incarceration    | -0.24<br>(-0.59, 0.10)  | 0.16    | -0.23<br>(-0.56, 0.10)  | 0.17    | -0.30<br>(-0.72, 0.11)  | 0.15    | -0.17<br>(-0.51, 0.17)  | 0.34    |
|                        | 1 stop, no parental incarceration   | -0.46<br>(-0.81, -0.11) | 0.01    | -0.39<br>(-0.73, -0.06) | 0.02    | -0.23<br>(-0.51, 0.05)  | 0.11    | -0.25<br>(-0.53, 0.03)  | 0.08    |
|                        | 1 stop, parental incarceration      | -0.43<br>(-0.76, -0.09) | 0.01    | -0.44<br>(-0.85, -0.02) | 0.04    | -1.04<br>(-2.39, 0.31)  | 0.13    | -0.89<br>(-2.17, 0.39)  | 0.17    |
|                        | 2+ stops, no parental incarceration | -0.51<br>(-0.80, -0.22) | 0.00    | -0.46<br>(-0.75, -0.18) | 0.00    | -0.43<br>(-0.70, -0.17) | 0.00    | -0.45<br>(-0.70, -0.20) | 0.00    |
|                        | 2+ stops, parental incarceration    | -0.09<br>(-1.29, 1.10)  | 0.88    | 0.01<br>(-0.04, 0.06)   | 0.69    | -0.07<br>(-0.46, 0.31)  | 0.71    | -0.02<br>(-0.45, -0.42) | 0.93    |
| Social well-being      | No stops, no parental incarceration | Ref.                    |         | Ref.                    |         | Ref.                    |         | Ref.                    |         |
|                        | No stops, parental incarceration    | -0.46<br>(-0.82, -0.10) | 0.01    | -0.37<br>(-0.73, -0.01) | 0.04    | -0.20<br>(-0.66, 0.26)  | 0.40    | -0.08<br>(-0.51, 0.36)  | 0.73    |
|                        | 1 stop, no parental incarceration   | -0.60<br>(-0.94, -0.26) | 0.00    | -0.52<br>(-0.85, -0.19) | 0.00    | 0.02<br>(-0.26, 0.30)   | 0.88    | 0.06<br>(-0.22, 0.34)   | 0.68    |
|                        | 1 stop, parental incarceration      | 0.03<br>(-0.52, 0.59)   | 0.90    | 0.18<br>(-0.59, 0.95)   | 0.66    | -0.89<br>(-1.82, 0.03)  | 0.06    | -0.76<br>(-1.75, 0.24)  | 0.14    |
|                        | 2+ stops, no parental incarceration | -0.75<br>(-1.06, -0.45) | 0.00    | -0.66<br>(-0.98, -0.35) | 0.00    | -0.42<br>(-0.73, -0.10) | 0.01    | -0.39<br>(-0.71, -0.08) | 0.01    |
|                        | 2+ stops, parental incarceration    | -1.78<br>(-2.54, -1.02) | 0.00    | -1.77<br>(-2.71, -0.82) | 0.00    | -0.32<br>(-0.99, 0.34)  | 0.34    | -0.29<br>(-0.98, 0.40)  | 0.41    |
| Psychologic well-being | No stops, no parental incarceration | Ref.                    |         | Ref.                    |         | Ref.                    |         | Ref.                    |         |
|                        | No stops, parental incarceration    | -0.29<br>(-0.59, 0.01)  | 0.05    | -0.28<br>(-0.58, 0.02)  | 0.07    | -0.17<br>(-0.51, 0.17)  | 0.32    | -0.03<br>(-0.38, 0.32)  | 0.85    |
|                        | 1 stop, no parental incarceration   | -0.35<br>(-0.62, -0.07) | 0.02    | -0.24<br>(-0.52, 0.04)  | 0.09    | -0.10<br>(-0.37, 0.17)  | 0.47    | -0.09<br>(-0.36, 0.19)  | 0.54    |
|                        | 1 stop, parental incarceration      | -0.06<br>(-0.37, 0.25)  | 0.71    | 0.06<br>(-0.26, 0.37)   | 0.73    | -0.53<br>(-1.32, 0.25)  | 0.18    | -0.31<br>(-1.06, 0.44)  | 0.42    |
|                        | 2+ stops, no parental incarceration | -0.30<br>(-0.60, 0.01)  | 0.05    | -0.23<br>(-0.51, 0.05)  | 0.11    | -0.28<br>(-0.54, -0.01) | 0.04    | -0.26<br>(-0.51, -0.01) | 0.04    |
|                        | 2+ stops, parental incarceration    | -1.14<br>(-1.80, -0.48) | 0.00    | -1.01<br>(-1.73, -0.28) | 0.01    | 0.13<br>(-0.35, 0.60)   | 0.60    | 0.14<br>(-0.34, 0.61)   | 0.58    |

**Appendix Table 6:** Measurement of study variables from the Panel Study of Income Dynamics (2002 & 2007)

| Variable                        | Respondent             | Measurement                                                                                                                                                                                                                                                                                                                                                                                                                                                                                                                                                                                                                                                                                                                                                                                                                                       | Coding                                                                                   |
|---------------------------------|------------------------|---------------------------------------------------------------------------------------------------------------------------------------------------------------------------------------------------------------------------------------------------------------------------------------------------------------------------------------------------------------------------------------------------------------------------------------------------------------------------------------------------------------------------------------------------------------------------------------------------------------------------------------------------------------------------------------------------------------------------------------------------------------------------------------------------------------------------------------------------|------------------------------------------------------------------------------------------|
| Children's Depression Inventory | Adolescent self-report | 10-item short form questions asking about the following feelings in the past two weeks:<br>1. Sad once in a while/many times/all the time<br>2. Nothing will ever work out for me/not sure if things will work out for me/thinks will work out OK for me<br>3. I do most things OK/many things OK/everything wrong<br>4. I hate/do not like/like myself<br>5. I feel like crying every day/many days/once in a while<br>6. Things bother me all the time/many times/once in a while<br>7. I look OK/There are some bad things about my looks/I look ugly (reverse coded)<br>8. I do not feel alone/I feel alone many times/I feel alone all the time<br>9. I have plenty of friends/I have some friends but wish I had more/I do not have any friends<br>10. Nobody really loves me/I am not sure if anybody loves me/I am sure somebody loves me | Continuous CDI score was calculated by summing items after correcting for reverse-coding |
| Emotional well-being scale      | Adolescent self-report | 3 Items asking about feelings in the last month with the responses never, once or twice, about once a week, 2 or 3 times a week, almost every day, every day:<br>1. How often did you feel happy?<br>2. How often did you feel interested in life?<br>3. How often did you feel satisfied?                                                                                                                                                                                                                                                                                                                                                                                                                                                                                                                                                        | Continuous mean score of items                                                           |
| Psychological well-being scale  | Adolescent self-report | 4 Items asking about feelings in the last month with the responses never, once or twice, about once a week, 2 or 3 times a week, almost every day, every day:<br>1. How often did you feel good at managing the responsibilities of your daily life?<br>2. How often did you feel that you have warm and trusting relationships with other kids?<br>3. How often did you feel you have experiences that challenged you to grow or become a better person?<br>4. How often did you feel confident to think or express your own ideas and opinions?                                                                                                                                                                                                                                                                                                 | Continuous mean score of items                                                           |
| Social well-being scale         | Adolescent self-report | 5 Items asking about feelings in the last month with the responses never, once or twice, about once a week, 2 or 3 times a week, almost every day, every day:<br>1. How often did you feel that you had something important to contribute to society?<br>2. How often did you feel that you belonged to a community (like a social group, your school, or your neighborhood)?<br>3. How often did you feel that our society is becoming a better place?<br>4. How often did you feel that people are basically good?<br>5. How often did you feel that the way our society works made sense to you?                                                                                                                                                                                                                                               | Continuous mean score of items                                                           |
| Frequency of police stops       | Adolescent self-report | In the past 6 months, about how many times have you been stopped by the police?                                                                                                                                                                                                                                                                                                                                                                                                                                                                                                                                                                                                                                                                                                                                                                   | 0 stops<br>1 stop<br>2+ stops                                                            |



|                          |                                                    |                                                                                                                                                                                                                                                                                                                                                                                                                                                                                                                                                                                                                                                                                                                                          |                                                                                                                                             |
|--------------------------|----------------------------------------------------|------------------------------------------------------------------------------------------------------------------------------------------------------------------------------------------------------------------------------------------------------------------------------------------------------------------------------------------------------------------------------------------------------------------------------------------------------------------------------------------------------------------------------------------------------------------------------------------------------------------------------------------------------------------------------------------------------------------------------------------|---------------------------------------------------------------------------------------------------------------------------------------------|
| Race/ethnicity           | Primary caregiver, & self                          | Primary care giver reported race/ethnicity of the adolescent, and when this is missing adolescent self-reported race/ethnicity was used                                                                                                                                                                                                                                                                                                                                                                                                                                                                                                                                                                                                  | Non-Hispanic White<br>Non-Hispanic Black<br>Hispanic<br>Asian & Pacific Islander<br>American Indian & Alaska Native<br>Multiracial<br>Other |
| Gender                   | From birth records & reported by head of household | Sex assigned at birth                                                                                                                                                                                                                                                                                                                                                                                                                                                                                                                                                                                                                                                                                                                    | Boys<br>Girls                                                                                                                               |
| Age                      | Study generated                                    | Age at the time of the primary caregiver interview constructed using the date of the interview and birth date of child                                                                                                                                                                                                                                                                                                                                                                                                                                                                                                                                                                                                                   | Continuous<br><16, >=16                                                                                                                     |
| Height                   | Assessment and self-report                         | Measured by interviewer. For 13 individuals for whom measured height was missing, we used reported weight: either height at last doctor's visit was used if the visit was in the last 5 months, or self-reported height.                                                                                                                                                                                                                                                                                                                                                                                                                                                                                                                 | Continuous                                                                                                                                  |
| Weight                   | Assessment and self-report                         | Measured by interviewer. For 22 individuals for whom measured weight was missing, we used reported weight: either at last doctor's visit was used if the visit was in the last 5 months, or self-reported weight.                                                                                                                                                                                                                                                                                                                                                                                                                                                                                                                        | Continuous                                                                                                                                  |
| Adolescent employment    | Adolescent self-report                             | Do you have a regularly paying job at the present time?                                                                                                                                                                                                                                                                                                                                                                                                                                                                                                                                                                                                                                                                                  | Employed<br>Not employed                                                                                                                    |
| Living in public housing | Head of household                                  | Is this house/apartment in a public housing project, that is, is it owned by a local housing authority or other public agency?                                                                                                                                                                                                                                                                                                                                                                                                                                                                                                                                                                                                           | Living in public housing<br>Not living in public housing                                                                                    |
| Wealth                   | Study generated                                    | Constructed as a sum of values of: value of farm/business, checking/saving account, real estate, stocks, vehicles, annuity/IRA, and negative debt value. Each of these variables is imputed by the PSID study staff. For households not in debt, we examined quartiles of wealth within each survey wave.                                                                                                                                                                                                                                                                                                                                                                                                                                | Debt<br>Quartile 1<br>Quartile 2<br>Quartile 3<br>Quartile 4                                                                                |
| Urbanicity               | Study-generated                                    | Beale Rural-Urban Code<br>1 Central counties of metropolitan areas of 1 million population or more<br>2 Fringe counties of metropolitan areas of 1 million population or more<br>3 Counties in metropolitan areas of 250 thousand to 1 million population<br>4 Counties in metropolitan areas of <250 thousand population<br>5 Urban population of 20,000 or more, adjacent to metropolitan area<br>6 Urban population of 20,000 or more, not adjacent to a metropolitan area<br>7 Urban population of <20,000, adjacent to a metropolitan area<br>8 Urban population of <20,000, not adjacent to a metropolitan area<br>9 Completely rural, adjacent to a metropolitan area<br>10 Completely rural, not adjacent to a metropolitan area | Indicators for each value [1,10]                                                                                                            |

|                                              |                        |                                                                                                                                                                                                                              |                                                                             |
|----------------------------------------------|------------------------|------------------------------------------------------------------------------------------------------------------------------------------------------------------------------------------------------------------------------|-----------------------------------------------------------------------------|
| Neighborhood safety                          | Primary caregiver      | How safe is it to walk around alone in your neighborhood after dark? Would you say it is completely safe, fairly safe, somewhat dangerous, extremely dangerous?                                                              | completely safe<br>fairly safe<br>somewhat dangerous<br>extremely dangerous |
| Moved in the past year                       | Primary caregiver      | How long have you lived in your current neighborhood? <1 year, 1 year to <3 years, 3 to <5 years, 5+ years                                                                                                                   | <1 year<br>>= 1 year                                                        |
| Closeness to mother and father               | Adolescent self-report | How close do you feel towards your mother/father? Would you say not very close, fairly close, quite close, or extremely close? Individuals that are not in contact with their mother/father are given a 0 for this question. | not very close<br>fairly close<br>quite close<br>extremely close            |
| Maternal and paternal educational attainment | Head and spouse        | Grades completed                                                                                                                                                                                                             | <12 years<br>12 years<br>13-16 years<br>>16 years                           |
